# Supplementary material for: Predicting Axillary Lymph Node Metastasis in Early Breast Cancer Using Deep Learning on Primary Tumor Biopsy Slides
Source: Front Oncol. 2021 Oct 14;11:759007. doi: 10.3389/fonc.2021.759007 (PMC8551965; doi:10.3389/fonc.2021.759007)
Supplement: Supplementary file 5 [file DataSheet_5.xlsx]

## Sheet: Sheet1
Patient ID	Age(years)	Tumour Size(cm)	Tumour Type	ER	PR	HER2	Dataset Type	Number of lymph node metastases	Label
284603	39	3.5	Invasive ductal carcinoma	Negative	Negative	Negative	train	4	1
285068	52	3	Invasive ductal carcinoma	Positive	Positive	Negative	val	7	1
286390	38	2.1	Invasive ductal carcinoma	Positive	Positive	Negative	val	2	0
286500	74	2.5	Invasive ductal carcinoma	Positive	Positive	Negative	val	4	1
289953	63	1.5	Invasive ductal carcinoma	Positive	Positive	Negative	train	3	1
290036	62	2.3	Invasive ductal carcinoma	Positive	Positive	Negative	test	1	0
290760	54	3	Invasive ductal carcinoma	Positive	Negative	Negative	train	4	1
293150	49	2.5	Invasive ductal carcinoma	Positive	Positive	Negative	val	5	1
293429	71	2.5	Invasive ductal carcinoma	Positive	Positive	Negative	train	1	0
294039	30	3	Invasive ductal carcinoma	Positive	Positive	Positive	test	6	1
294549	57	2.5	Invasive ductal carcinoma	Negative	Negative	Positive	test	8	1
296948	52	2.4	Invasive ductal carcinoma	Positive	Positive	Negative	train	2	0
296949	40	2	Invasive ductal carcinoma	Positive	Positive	Negative	test	6	1
297777	35	3.5	Invasive ductal carcinoma	Positive	Positive	Negative	val	1	0
298373	58	3	Invasive ductal carcinoma	Positive	Positive	Negative	train	8	1
299238	72	2	Invasive ductal carcinoma	Positive	Positive	Negative	train	1	0
304712	58	2.5	Invasive ductal carcinoma	Negative	Negative	Negative	train	1	0
304812	65	2.8	Invasive ductal carcinoma	Negative	Negative	Negative	train	1	0
304925	71	1.5	Invasive ductal carcinoma	Positive	Positive	Negative	test	2	0
316127	49	1.4	Invasive ductal carcinoma	Positive	Positive	Negative	val	1	0
316821	56	3	Invasive ductal carcinoma	Positive	Negative	Negative	test	4	1
317038	38	4	Invasive ductal carcinoma	Positive	Positive	Negative	train	2	0
317190	33	1.5	Invasive ductal carcinoma	Positive	Positive	Negative	test	1	0
320526	42	1.6	Other type	Positive	Positive	Negative	val	2	0
320701	48	2	Invasive ductal carcinoma	Positive	Positive	Negative	train	1	0
320702	74	1.5	Invasive ductal carcinoma	Positive	Positive	Negative	test	2	0
321088	71	4	Invasive ductal carcinoma	Positive	Positive	Negative	test	6	1
322510	42	1.5	Invasive ductal carcinoma	Positive	Positive	Negative	train	1	0
326787	42	3.5	Invasive ductal carcinoma	Positive	Positive	Negative	train	1	0
327260	50	4	Invasive ductal carcinoma	Positive	Positive	Negative	test	6	1
328955	44	2	Invasive ductal carcinoma	Positive	Positive	Negative	val	1	0
331309	47	3.5	Invasive ductal carcinoma	Positive	Positive	Negative	test	3	1
331548	60	3	Invasive ductal carcinoma	Negative	Negative	Negative	test	1	0
332119	72	1.8	Invasive ductal carcinoma	Positive	Positive	Negative	val	1	0
333176	55	3	Invasive ductal carcinoma	Positive	Positive	Negative	train	3	1
333873	42	3	Invasive ductal carcinoma	Positive	Positive	Negative	val	7	1
333954	51	3	Invasive ductal carcinoma	Negative	Negative	Negative	test	3	1
334406	49	3	Invasive ductal carcinoma	Negative	Negative	Negative	train	2	0
334589	48	1	Invasive ductal carcinoma	Positive	Positive	Negative	test	2	0
336634	73	1.5	Invasive ductal carcinoma	Positive	Positive	Negative	test	4	1
337344	40	1.7	Invasive ductal carcinoma	Positive	Positive	Negative	train	6	1
337500	44	4	Invasive ductal carcinoma	Positive	Positive	Positive	train	1	0
338078	80	2.5	Invasive ductal carcinoma	Positive	Positive	Negative	train	3	1
338080	76	2	Invasive ductal carcinoma	Positive	Positive	Negative	train	3	1
338081	46	4	Invasive ductal carcinoma	Positive	Positive	Positive	test	2	0
338610	48	2	Invasive ductal carcinoma	Positive	Positive	Negative	train	1	0
340973	53	3	Other type	Positive	Positive	Positive	train	2	0
341311	51	2.5	Invasive ductal carcinoma	Positive	Positive	Negative	test	5	1
343168	49	1.8	Invasive ductal carcinoma	Positive	Positive	Negative	test	4	1
343219	79	3.6	Invasive ductal carcinoma	Positive	Positive	Negative	val	3	1
343679	51	3	Invasive ductal carcinoma	Positive	Negative	Negative	val	5	1
344644	41	1.7	Invasive ductal carcinoma	Negative	Negative	Positive	val	1	0
344741	56	3.5	Invasive ductal carcinoma	Negative	Negative	Negative	train	6	1
344742	68	2	Other type	Positive	Positive	Negative	val	4	1
346565	72	2.5	Invasive ductal carcinoma	Positive	Positive	Positive	train	5	1
348787	62	2.5	Other type	Positive	Positive	Negative	train	2	0
348823	65	3	Invasive ductal carcinoma	Positive	Positive	Negative	train	3	1
349120	60	4	Other type	Negative	Negative	Negative	val	6	1
349253	58	2.5	Invasive ductal carcinoma	Positive	Positive	Negative	test	1	0
349896	49	1.2	Invasive ductal carcinoma	Positive	Positive	Negative	test	2	0
350216	73	3.7	Invasive ductal carcinoma	Positive	Positive	Negative	train	1	0
351460	49	1.5	Invasive ductal carcinoma	Positive	Positive	Negative	val	1	0
351899	46	2.6	Invasive ductal carcinoma	Positive	Positive	Negative	test	7	1
351957	50	4	Invasive ductal carcinoma	Positive	Positive	Negative	val	1	0
351958	37	3.5	Invasive ductal carcinoma	Positive	Positive	Negative	train	2	0
353463	77	3	Invasive ductal carcinoma	Negative	Negative	Negative	test	1	0
354055	54	3.5	Invasive ductal carcinoma	Positive	Positive	Negative	train	6	1
354852	63	1.5	Invasive ductal carcinoma	Positive	Positive	Negative	train	1	0
356398	58	2.5	Invasive ductal carcinoma	Positive	Positive	Negative	train	1	0
361385	77	2	Invasive ductal carcinoma	Positive	Positive	Negative	val	7	1
363253	41	1.7	Invasive ductal carcinoma	Positive	Positive	Negative	train	7	1
363256	36	1.5	Invasive ductal carcinoma	Positive	Positive	Negative	test	1	0
366690	37	3	Invasive ductal carcinoma	Positive	Negative	Negative	train	5	1
366781	46	1	Invasive ductal carcinoma	Positive	Positive	Positive	train	3	1
366896	63	3	Invasive ductal carcinoma	Positive	Positive	Negative	val	1	0
367345	58	3.5	Invasive ductal carcinoma	Positive	Positive	Negative	train	2	0
367888	46	2.5	Invasive ductal carcinoma	Positive	Positive	Positive	train	7	1
368193	37	0.9	Invasive ductal carcinoma	Positive	Positive	Negative	train	1	0
368280	67	2.1	Invasive ductal carcinoma	Positive	Positive	Negative	test	1	0
369393	66	2.5	Invasive ductal carcinoma	Positive	Positive	Negative	train	5	1
369716	51	1.4	Invasive ductal carcinoma	Negative	Negative	Positive	val	2	0
370305	56	2	Invasive ductal carcinoma	Positive	Positive	Negative	train	3	1
370506	44	2	Invasive ductal carcinoma	Positive	Positive	Negative	val	1	0
370992	62	0.6	Invasive ductal carcinoma	Positive	Positive	Positive	test	6	1
371101	36	3	Invasive ductal carcinoma	Positive	Positive	Negative	train	6	1
371812	72	4.5	Invasive ductal carcinoma	Positive	Positive	Negative	test	7	1
372353	80	2.5	Invasive ductal carcinoma	Positive	Positive	Negative	val	4	1
372481	54	2.2	Invasive ductal carcinoma	Positive	Positive	Positive	val	1	0
372513	51	4	Invasive ductal carcinoma	Positive	Negative	Positive	val	3	1
373199	46	2	Invasive ductal carcinoma	Positive	Positive	Negative	val	5	1
373648	32	3	Invasive ductal carcinoma	Positive	Positive	Positive	train	5	1
375778	49	2.3	Invasive ductal carcinoma	Positive	Negative	Positive	train	4	1
377433	68	1.5	Invasive ductal carcinoma	Positive	Positive	Positive	train	5	1
377914	72	3	Invasive ductal carcinoma	Positive	Positive	Negative	train	1	0
378050	56	4	Invasive ductal carcinoma	Positive	Positive	Positive	train	1	0
379939	51	0.6	Invasive ductal carcinoma	Positive	Positive	Negative	train	1	0
379940	52	3.5	Invasive ductal carcinoma	Negative	Negative	Positive	test	1	0
382342	60	3	Invasive ductal carcinoma	Positive	Positive	Negative	train	1	0
382389	54	3	Invasive ductal carcinoma	Positive	Negative	Positive	train	2	0
384055	53	2	Invasive lobular carcinoma	Positive	Positive	Negative	test	1	0
385110	50	4	Invasive ductal carcinoma	Positive	Positive	Negative	train	4	1
385281	75	3.5	Invasive ductal carcinoma	Positive	Positive	Negative	train	1	0
385937	59	3	Invasive ductal carcinoma	Negative	Negative	Positive	train	5	1
388933	51	4.5	Invasive ductal carcinoma	Negative	Negative	Positive	train	4	1
388977	62	2.5	Other type	Positive	Positive	Positive	test	6	1
389510	65	3	Invasive ductal carcinoma	Positive	Positive	Negative	val	8	1
389935	72	2	Invasive ductal carcinoma	Negative	Negative	Negative	train	4	1
393089	39	1.5	Invasive ductal carcinoma	Positive	Positive	Negative	train	2	0
393090	53	2	Invasive ductal carcinoma	Negative	Negative	Positive	test	5	1
393757	50	5.5	Invasive ductal carcinoma	Negative	Negative	Negative	train	9	1
394191	57	4.5	Invasive ductal carcinoma	Positive	Positive	Negative	train	2	0
394485	72	2.2	Invasive ductal carcinoma	Positive	Positive	Negative	val	4	1
394844	83	3.5	Invasive ductal carcinoma	Positive	Positive	Negative	train	4	1
395366	66	1.5	Invasive ductal carcinoma	Negative	Negative	Negative	train	1	0
395570	35	1.5	Invasive ductal carcinoma	Positive	Positive	Negative	train	4	1
396612	35	3	Invasive ductal carcinoma	Positive	Positive	Negative	train	1	0
397370	59	1.8	Invasive ductal carcinoma	Positive	Positive	Negative	train	6	1
397995	31	3	Invasive ductal carcinoma	Positive	Positive	Positive	train	3	1
398585	62	2	Invasive ductal carcinoma	Positive	Positive	Positive	train	1	0
399539	81	2	Invasive ductal carcinoma	Positive	Positive	Negative	train	3	1
400996	47	2.3	Invasive ductal carcinoma	Positive	Positive	Negative	train	6	1
403264	44	2	Invasive ductal carcinoma	Positive	Positive	Negative	train	2	0
403357	43	2	Invasive ductal carcinoma	Negative	Negative	Positive	train	1	0
403616	49	1.2	Invasive ductal carcinoma	Positive	Positive	Negative	train	3	1
403938	37	1.5	Invasive ductal carcinoma	Positive	Positive	Negative	train	3	1
404254	50	2	Invasive ductal carcinoma	Positive	Positive	Positive	train	4	1
405361	56	2.9	Invasive ductal carcinoma	Positive	Positive	Positive	train	2	0
406353	46	3	Other type	Positive	Positive	Negative	train	2	0
406397	45	1.5	Invasive ductal carcinoma	Positive	Positive	Negative	train	1	0
407048	39	1.5	Invasive ductal carcinoma	Positive	Positive	Negative	train	1	0
410091	61	3	Invasive ductal carcinoma	Positive	Positive	Negative	train	1	0
410161	46	1.5	Invasive ductal carcinoma	Positive	Positive	Negative	train	6	1
410470	50	1.5	Invasive ductal carcinoma	Negative	Negative	Negative	train	4	1
412787	50	3.5	Invasive ductal carcinoma	Negative	Negative	Negative	train	2	0
412984	35	2.2	Invasive ductal carcinoma	Positive	Positive	Negative	train	3	1
413245	57	2.3	Invasive lobular carcinoma	Positive	Positive	Negative	val	2	0
413628	63	1	Invasive ductal carcinoma	Positive	Positive	Negative	test	2	0
415104	75	3	Invasive ductal carcinoma	Positive	Positive	Positive	test	2	0
415275	53	3.5	Invasive ductal carcinoma	Positive	Positive	Negative	train	7	1
415368	66	2	Invasive ductal carcinoma	Negative	Negative	Negative	val	2	0
415557	51	1	Invasive ductal carcinoma	Positive	Positive	Negative	val	3	1
417018	57	3.5	Invasive ductal carcinoma	Positive	Negative	Negative	train	5	1
417313	53	2.5	Invasive ductal carcinoma	Negative	Negative	Positive	val	8	1
418763	69	1.5	Invasive ductal carcinoma	Positive	Positive	Negative	train	1	0
418975	51	2	Invasive ductal carcinoma	Negative	Negative	Negative	train	1	0
419192	51	4	Invasive ductal carcinoma	Positive	Positive	Positive	train	6	1
419874	51	2.5	Invasive ductal carcinoma	Positive	Positive	Negative	train	5	1
420313	43	3	Invasive ductal carcinoma	Negative	Negative	Positive	train	9	1
423020	61	2.5	Invasive ductal carcinoma	Positive	Positive	Negative	val	7	1
424024	56	2.5	Invasive ductal carcinoma	Positive	Positive	Negative	train	1	0
424417	62	1.5	Invasive ductal carcinoma	Positive	Positive	Negative	test	3	1
424606	44	1.2	Invasive ductal carcinoma	Positive	Positive	Positive	train	2	0
425344	71	3	Invasive ductal carcinoma	Positive	Positive	Negative	train	7	1
425359	52	4	Invasive ductal carcinoma	Positive	Positive	Negative	train	4	1
427745	48	2	Invasive ductal carcinoma	Positive	Positive	Positive	test	1	0
429355	59	3	Invasive ductal carcinoma	Negative	Negative	Negative	test	1	0
429875	75	4.5	Invasive ductal carcinoma	Negative	Negative	Negative	test	1	0
430427	77	2	Invasive ductal carcinoma	Positive	Positive	Negative	train	2	0
432204	57	2.8	Invasive ductal carcinoma	Positive	Positive	Negative	train	1	0
433388	42	1.5	Invasive ductal carcinoma	Positive	Positive	Negative	train	1	0
433527	71	4	Invasive ductal carcinoma	Positive	Positive	Negative	train	1	0
434563	31	2	Invasive ductal carcinoma	Positive	Positive	Negative	train	6	1
435731	53	3	Invasive ductal carcinoma	Positive	Positive	Negative	val	4	1
436719	43	3.5	Invasive ductal carcinoma	Negative	Negative	Negative	test	6	1
437232	76	1.2	Invasive ductal carcinoma	Positive	Positive	Negative	train	1	0
438138	58	2	Invasive ductal carcinoma	Positive	Positive	Negative	train	3	1
438259	49	1.8	Invasive ductal carcinoma	Positive	Positive	Negative	val	2	0
440333	46	1.8	Invasive ductal carcinoma	Positive	Positive	Negative	train	3	1
440407	39	2	Invasive ductal carcinoma	Positive	Positive	Positive	train	2	0
440508	62	1.2	Invasive ductal carcinoma	Positive	Positive	Negative	test	1	0
440738	43	1.2	Invasive ductal carcinoma	Positive	Positive	Negative	test	1	0
440792	47	4	Invasive ductal carcinoma	Positive	Positive	Negative	val	5	1
442562	69	4	Invasive ductal carcinoma	Positive	Positive	Positive	train	2	0
445531	48	3	Invasive ductal carcinoma	Positive	Positive	Negative	train	3	1
445652	66	3	Invasive ductal carcinoma	Positive	Positive	Negative	train	4	1
446839	65	3	Invasive ductal carcinoma	Positive	Positive	Negative	train	3	1
447165	53	1.7	Invasive ductal carcinoma	Positive	Negative	Negative	train	3	1
447266	61	1.8	Invasive ductal carcinoma	Positive	Positive	Negative	train	4	1
447727	75	2.7	Invasive ductal carcinoma	Positive	Positive	Positive	train	3	1
448275	51	3.5	Invasive ductal carcinoma	Positive	Negative	Negative	train	8	1
449271	46	3	Invasive ductal carcinoma	Positive	Positive	Positive	train	1	0
449519	35	3.5	Invasive ductal carcinoma	Negative	Negative	Positive	train	4	1
449834	54	2	Invasive ductal carcinoma	Positive	Positive	Negative	train	3	1
449896	59	2	Invasive ductal carcinoma	Positive	Positive	Positive	train	8	1
450419	84	1.5	Invasive ductal carcinoma	Positive	Positive	Negative	val	5	1
450694	66	0.9	Invasive ductal carcinoma	Positive	Positive	Negative	val	3	1
451607	66	3.5	Invasive ductal carcinoma	Positive	Positive	Positive	test	4	1
451884	38	2.5	Invasive ductal carcinoma	Positive	Negative	Positive	train	1	0
452250	46	4	Invasive ductal carcinoma	Negative	Negative	Positive	train	1	0
452430	51	3.5	Invasive ductal carcinoma	Positive	Positive	Negative	train	1	0
452436	74	4.5	Other type	Negative	Negative	Positive	test	3	1
452448	39	2	Invasive ductal carcinoma	Positive	Positive	Positive	val	3	1
453395	82	2.4	Invasive ductal carcinoma	Positive	Positive	Negative	test	1	0
453962	51	2.2	Invasive ductal carcinoma	Positive	Positive	Negative	train	1	0
455336	47	2.2	Invasive ductal carcinoma	Positive	Positive	Positive	val	5	1
456360	42	2	Invasive ductal carcinoma	Positive	Positive	Negative	test	2	0
456642	43	2.5	Invasive ductal carcinoma	Positive	Positive	Positive	train	2	0
457365	45	1.5	Invasive ductal carcinoma	Positive	Positive	Negative	val	5	1
457367	48	2.5	Invasive ductal carcinoma	Positive	Positive	Negative	val	6	1
457832	50	3	Invasive ductal carcinoma	Positive	Positive	Negative	val	7	1
458001	57	1.5	Invasive ductal carcinoma	Positive	Positive	Positive	train	4	1
458254	74	1.8	Invasive ductal carcinoma	Positive	Positive	Negative	train	1	0
458805	59	1.6	Invasive ductal carcinoma	Negative	Negative	Positive	train	1	0
458815	61	1.5	Invasive ductal carcinoma	Positive	Positive	Negative	train	2	0
459928	38	3.5	Invasive ductal carcinoma	Positive	Positive	Negative	train	1	0
460648	50	2.5	Invasive ductal carcinoma	Negative	Negative	Positive	train	2	0
460695	62	2.2	Invasive ductal carcinoma	Positive	Positive	Negative	train	3	1
460918	52	2	Invasive lobular carcinoma	Positive	Positive	Negative	val	2	0
461292	53	1.5	Invasive ductal carcinoma	Negative	Negative	Positive	test	7	1
461784	30	2.3	Invasive ductal carcinoma	Positive	Positive	Negative	train	2	0
462126	69	1.5	Invasive ductal carcinoma	Negative	Negative	Positive	val	1	0
462736	56	1.7	Invasive ductal carcinoma	Positive	Positive	Negative	test	2	0
462786	41	3	Invasive ductal carcinoma	Positive	Positive	Negative	test	3	1
462789	57	2.5	Other type	Positive	Positive	Negative	test	1	0
464099	47	2.5	Invasive ductal carcinoma	Negative	Negative	Positive	train	3	1
465156	75	4	Invasive ductal carcinoma	Positive	Negative	Positive	train	5	1
465529	47	3	Invasive ductal carcinoma	Positive	Positive	Negative	train	3	1
465600	61	2	Invasive ductal carcinoma	Negative	Negative	Negative	train	3	1
465814	51	1.5	Invasive ductal carcinoma	Positive	Positive	Negative	train	2	0
465949	62	2	Invasive ductal carcinoma	Positive	Positive	Negative	train	1	0
468270	65	1.2	Invasive ductal carcinoma	Positive	Positive	Positive	train	4	1
469143	66	1.5	Invasive ductal carcinoma	Positive	Positive	Positive	val	8	1
469387	48	3	Invasive ductal carcinoma	Negative	Negative	Negative	train	1	0
470510	48	2.8	Invasive ductal carcinoma	Positive	Positive	Negative	val	9	1
471981	83	1.5	Invasive ductal carcinoma	Positive	Positive	Negative	train	3	1
472711	45	2.2	Other type	Positive	Positive	Negative	train	1	0
473455	66	2	Invasive ductal carcinoma	Positive	Positive	Positive	train	1	0
473944	52	1.5	Invasive ductal carcinoma	Positive	Positive	Negative	val	1	0
474475	66	2.3	Invasive ductal carcinoma	Positive	Positive	Negative	train	8	1
474806	54	1.6	Invasive ductal carcinoma	Positive	Positive	Negative	val	1	0
474953	64	2.5	Invasive ductal carcinoma	Positive	Positive	Negative	train	1	0
475602	46	2.5	Invasive ductal carcinoma	Positive	Positive	Negative	test	1	0
476197	41	3.5	Invasive ductal carcinoma	Negative	Negative	Positive	val	1	0
476250	33	2.3	Other type	Negative	Negative	Negative	train	2	0
476781	56	2.5	Invasive ductal carcinoma	Positive	Positive	Negative	train	5	1
476928	61	2.2	Invasive ductal carcinoma	Negative	Positive	Negative	train	2	0
478494	29	1.5	Invasive ductal carcinoma	Positive	Positive	Positive	train	2	0
479655	47	2.2	Invasive ductal carcinoma	Positive	Positive	Positive	val	1	0
479685	63	2.5	Invasive ductal carcinoma	Positive	Positive	Positive	val	3	1
479755	90	3.5	Invasive ductal carcinoma	Negative	Positive	Negative	train	1	0
480153	76	1.2	Invasive ductal carcinoma	Positive	Positive	Negative	train	8	1
481157	55	3.5	Invasive ductal carcinoma	Positive	Positive	Negative	train	3	1
481538	73	4	Invasive ductal carcinoma	Positive	Negative	Positive	val	1	0
481915	58	2.8	Invasive ductal carcinoma	Positive	Positive	Negative	train	2	0
483850	52	2	Invasive ductal carcinoma	Positive	Positive	Negative	train	2	0
484017	83	1.5	Invasive ductal carcinoma	Positive	Positive	Negative	test	1	0
484549	50	2	Invasive ductal carcinoma	Positive	Positive	Negative	val	7	1
484776	62	1.3	Invasive ductal carcinoma	Positive	Positive	Negative	val	1	0
485571	59	4	Invasive ductal carcinoma	Positive	Positive	Negative	train	1	0
485598	87	3	Invasive ductal carcinoma	Positive	Positive	Positive	test	1	0
486324	73	1.8	Invasive ductal carcinoma	Positive	Positive	Negative	val	1	0
487098	37	3.5	Invasive ductal carcinoma	Positive	Positive	Positive	test	2	0
487120	82	2	Invasive ductal carcinoma	Positive	Positive	Negative	train	7	1
489215	56	3	Invasive ductal carcinoma	Positive	Negative	Negative	train	5	1
489256	40	1.7	Invasive ductal carcinoma	Positive	Positive	Negative	train	5	1
491067	49	0.9	Invasive ductal carcinoma	Positive	Positive	Negative	train	1	0
491491	49	2.1	Invasive ductal carcinoma	Positive	Positive	Positive	train	1	0
492615	39	1.5	Invasive ductal carcinoma	Positive	Positive	Negative	train	1	0
493268	53	2.5	Other type	Positive	Positive	Negative	train	1	0
494904	58	2.5	Invasive ductal carcinoma	Positive	Positive	Negative	train	4	1
495638	67	3	Other type	Positive	Positive	Negative	test	4	1
496705	37	1.5	Invasive ductal carcinoma	Positive	Positive	Negative	train	1	0
498451	79	2.2	Other type	Positive	Positive	Negative	train	2	0
498682	39	3	Invasive ductal carcinoma	Positive	Positive	Negative	train	1	0
499684	60	2.8	Invasive ductal carcinoma	Positive	Positive	Positive	train	2	0
499864	62	3	Invasive ductal carcinoma	Positive	Positive	Negative	train	1	0
499977	69	3	Invasive ductal carcinoma	Negative	Positive	Positive	train	5	1
501448	76	1.8	Invasive ductal carcinoma	Positive	Positive	Negative	train	1	0
503028	48	3	Invasive ductal carcinoma	Positive	Positive	Negative	train	5	1
503029	50	3	Invasive ductal carcinoma	Negative	Negative	Positive	train	8	1
503289	65	2.5	Invasive ductal carcinoma	Positive	Positive	Negative	train	2	0
503432	55	1.5	Other type	Positive	Positive	Negative	test	1	0
503853	65	1.5	Invasive ductal carcinoma	Positive	Positive	Positive	test	5	1
504872	72	2.5	Invasive ductal carcinoma	Negative	Negative	Positive	val	5	1
505423	56	3	Invasive ductal carcinoma	Positive	Positive	Negative	test	9	1
506911	62	2.5	Invasive ductal carcinoma	Positive	Positive	Positive	train	4	1
507030	54	1	Invasive ductal carcinoma	Positive	Positive	Positive	test	3	1
507785	42	2.5	Invasive ductal carcinoma	Positive	Positive	Positive	test	1	0
508377	53	1.9	Invasive ductal carcinoma	Positive	Positive	Negative	train	1	0
508764	61	3.5	Invasive ductal carcinoma	Positive	Positive	Positive	test	9	1
508981	62	2.5	Invasive ductal carcinoma	Positive	Positive	Positive	val	1	0
511648	32	3.5	Invasive ductal carcinoma	Positive	Positive	Positive	train	3	1
511748	64	1.5	Invasive ductal carcinoma	Positive	Positive	Negative	test	2	0
512008	47	2.5	Other type	Negative	Negative	Negative	train	1	0
513295	59	2.5	Invasive ductal carcinoma	Positive	Positive	Negative	val	8	1
514095	60	1	Invasive ductal carcinoma	Positive	Positive	Negative	test	7	1
516502	60	1.1	Invasive ductal carcinoma	Positive	Positive	Negative	test	1	0
517636	33	2	Invasive ductal carcinoma	Positive	Positive	Negative	test	1	0
518049	43	2.5	Invasive ductal carcinoma	Positive	Positive	Negative	val	1	0
518513	39	2.5	Invasive ductal carcinoma	Negative	Negative	Positive	train	4	1
519730	67	4	Invasive ductal carcinoma	Positive	Positive	Negative	train	2	0
521244	67	1.2	Invasive ductal carcinoma	Positive	Positive	Negative	train	2	0
522190	57	2	Invasive ductal carcinoma	Positive	Positive	Positive	test	2	0
522382	36	1	Invasive ductal carcinoma	Positive	Positive	Negative	test	2	0
525184	77	2.5	Invasive lobular carcinoma	Positive	Positive	Negative	train	2	0
526108	61	3	Invasive ductal carcinoma	Positive	Positive	Negative	test	9	1
526583	49	1.8	Invasive ductal carcinoma	Positive	Positive	Negative	train	1	0
526929	56	1.5	Invasive ductal carcinoma	Positive	Positive	Negative	train	1	0
527240	49	3	Invasive ductal carcinoma	Negative	Negative	Positive	train	9	1
529680	49	2	Invasive ductal carcinoma	Positive	Positive	Negative	train	4	1
530117	57	2	Invasive ductal carcinoma	Positive	Negative	Positive	train	9	1
530286	66	2	Invasive ductal carcinoma	Positive	Positive	Positive	test	1	0
530411	62	2	Invasive ductal carcinoma	Positive	Positive	Negative	train	1	0
530412	55	2.2	Invasive ductal carcinoma	Positive	Positive	Negative	train	1	0
530736	58	1.7	Invasive ductal carcinoma	Positive	Positive	Positive	train	1	0
530906	36	3.4	Other type	Positive	Positive	Positive	train	7	1
532520	40	2	Invasive ductal carcinoma	Positive	Positive	Negative	val	3	1
532621	62	3.2	Invasive ductal carcinoma	Positive	Positive	Negative	val	9	1
537746	64	3	Invasive ductal carcinoma	Positive	Positive	Negative	test	1	0
538480	43	2.5	Invasive ductal carcinoma	Negative	Negative	Negative	test	1	0
538985	83	2	Invasive ductal carcinoma	Positive	Negative	Negative	val	2	0
540597	76	2.3	Invasive ductal carcinoma	Positive	Positive	Negative	train	2	0
540610	44	3.5	Invasive ductal carcinoma	Positive	Positive	Positive	val	2	0
540883	70	3	Other type	Positive	Positive	Negative	test	2	0
541099	40	2	Other type	Positive	Positive	Positive	train	4	1
541271	63	1.5	Invasive ductal carcinoma	Positive	Positive	Negative	test	3	1
541482	28	3.5	Invasive ductal carcinoma	Negative	Negative	Negative	test	2	0
542111	65	4.5	Invasive ductal carcinoma	Positive	Positive	Negative	train	3	1
542119	58	3.5	Invasive ductal carcinoma	Positive	Positive	Positive	train	4	1
542272	69	2	Invasive ductal carcinoma	Negative	Negative	Negative	train	3	1
543066	53	1.5	Invasive ductal carcinoma	Positive	Negative	Negative	val	1	0
544287	56	3	Invasive ductal carcinoma	Positive	Positive	Positive	train	9	1
544876	78	4	Invasive ductal carcinoma	Positive	Positive	Positive	train	6	1
544930	49	2.5	Invasive ductal carcinoma	Positive	Positive	Negative	train	2	0
549166	66	3	Invasive lobular carcinoma	Positive	Positive	Negative	train	4	1
549837	66	2.5	Invasive ductal carcinoma	Negative	Positive	Negative	train	3	1
551895	72	3	Invasive ductal carcinoma	Positive	Positive	Negative	train	2	0
552211	36	2	Invasive ductal carcinoma	Positive	Positive	Negative	train	5	1
555734	65	2.5	Invasive ductal carcinoma	Negative	Negative	Negative	train	2	0
556189	68	1.5	Invasive ductal carcinoma	Positive	Positive	Positive	train	2	0
557088	64	3.5	Invasive ductal carcinoma	Negative	Negative	Positive	val	8	1
557096	68	2	Invasive ductal carcinoma	Positive	Positive	Negative	test	3	1
557225	54	2.5	Invasive ductal carcinoma	Negative	Negative	Positive	train	2	0
558083	62	1.7	Invasive ductal carcinoma	Positive	Negative	Positive	train	1	0
558748	62	2.8	Invasive ductal carcinoma	Positive	Negative	Negative	train	4	1
559779	40	1.5	Invasive ductal carcinoma	Negative	Negative	Positive	train	4	1
561614	46	3	Invasive ductal carcinoma	Negative	Negative	Positive	test	7	1
562906	55	2.5	Invasive ductal carcinoma	Positive	Negative	Negative	train	8	1
564302	66	1.8	Invasive ductal carcinoma	Positive	Positive	Negative	train	1	0
564364	51	2.2	Invasive ductal carcinoma	Positive	Positive	Negative	train	1	0
564782	87	4.5	Invasive ductal carcinoma	Positive	Positive	Negative	train	7	1
565024	33	2.8	Invasive ductal carcinoma	Positive	Positive	Positive	train	1	0
565029	69	2.3	Invasive ductal carcinoma	Positive	Negative	Positive	train	2	0
565170	54	3.5	Invasive ductal carcinoma	Positive	Positive	Negative	train	6	1
565341	79	3	Invasive ductal carcinoma	Negative	Negative	Negative	train	1	0
565617	50	3	Invasive ductal carcinoma	Positive	Positive	Positive	test	4	1
565990	34	3	Invasive ductal carcinoma	Positive	Positive	Negative	train	2	0
566930	50	1.9	Invasive ductal carcinoma	Positive	Positive	Positive	train	2	0
569370	82	1.8	Invasive ductal carcinoma	Positive	Positive	Negative	test	2	0
569378	60	2.6	Invasive ductal carcinoma	Positive	Positive	Negative	val	1	0
569940	55	2.5	Invasive ductal carcinoma	Positive	Positive	Negative	train	7	1
570107	38	3	Invasive ductal carcinoma	Negative	Negative	Negative	val	1	0
571197	58	2.5	Invasive ductal carcinoma	Positive	Positive	Negative	val	3	1
572100	77	2	Invasive ductal carcinoma	Positive	Positive	Negative	train	2	0
572107	47	2.5	Invasive ductal carcinoma	Positive	Positive	Negative	train	3	1
572911	74	1.5	Invasive ductal carcinoma	Positive	Positive	Negative	train	7	1
573145	63	1.8	Invasive ductal carcinoma	Positive	Positive	Negative	val	2	0
573738	62	1.5	Invasive ductal carcinoma	Negative	Negative	Positive	train	5	1
574271	49	1.5	Invasive ductal carcinoma	Positive	Positive	Negative	test	3	1
575264	43	3.5	Invasive ductal carcinoma	Positive	Negative	Negative	train	6	1
575655	59	3	Invasive ductal carcinoma	Positive	Positive	Positive	test	1	0
578398	76	3.2	Invasive ductal carcinoma	Positive	Positive	Negative	train	1	0
580205	64	3.5	Invasive ductal carcinoma	Positive	Positive	Positive	train	6	1
580360	71	1.3	Invasive ductal carcinoma	Positive	Positive	Negative	val	4	1
581097	38	3.5	Invasive ductal carcinoma	Positive	Positive	Negative	test	1	0
581306	52	3	Invasive ductal carcinoma	Positive	Positive	Negative	train	1	0
581762	54	4.5	Invasive ductal carcinoma	Positive	Positive	Negative	val	8	1
581787	41	3	Invasive ductal carcinoma	Positive	Positive	Negative	train	1	0
582704	75	4	Invasive ductal carcinoma	Negative	Negative	Negative	val	1	0
583149	68	2.5	Invasive ductal carcinoma	Positive	Positive	Negative	val	1	0
583633	58	2	Invasive ductal carcinoma	Positive	Positive	Negative	train	1	0
584614	48	3.5	Invasive ductal carcinoma	Positive	Positive	Negative	train	2	0
584616	55	3.5	Invasive ductal carcinoma	Negative	Negative	Negative	train	1	0
584833	67	1.5	Invasive ductal carcinoma	Positive	Positive	Negative	train	3	1
585446	50	3	Invasive ductal carcinoma	Positive	Positive	Positive	train	2	0
585448	52	2.3	Other type	Negative	Negative	Negative	val	1	0
586990	60	3	Invasive ductal carcinoma	Positive	Positive	Negative	train	1	0
588125	44	2.5	Invasive ductal carcinoma	Positive	Positive	Negative	val	1	0
588507	62	1.8	Invasive ductal carcinoma	Positive	Positive	Negative	test	3	1
588741	62	2.2	Invasive ductal carcinoma	Positive	Positive	Positive	train	1	0
590958	73	2.3	Invasive lobular carcinoma	Positive	Positive	Negative	test	3	1
590960	64	3	Invasive ductal carcinoma	Positive	Positive	Positive	val	1	0
591467	71	1.5	Invasive ductal carcinoma	Positive	Positive	Negative	test	4	1
592443	36	3	Invasive ductal carcinoma	Positive	Positive	Positive	train	1	0
593192	56	2.2	Invasive ductal carcinoma	Positive	Positive	Negative	train	3	1
593694	48	1.5	Invasive ductal carcinoma	Negative	Negative	Negative	test	7	1
594237	55	2	Invasive ductal carcinoma	Negative	Negative	Positive	val	2	0
595137	71	4	Other type	Negative	Negative	Negative	val	6	1
595988	39	3	Invasive ductal carcinoma	Negative	Negative	Negative	train	1	0
596824	51	1	Invasive ductal carcinoma	Positive	Positive	Negative	val	2	0
600076	78	3	Invasive ductal carcinoma	Positive	Positive	Negative	test	2	0
600939	84	3	Invasive ductal carcinoma	Positive	Negative	Positive	test	6	1
602100	69	2	Invasive ductal carcinoma	Positive	Positive	Negative	train	1	0
602796	58	2.5	Invasive ductal carcinoma	Negative	Negative	Negative	train	1	0
602836	57	1.7	Invasive ductal carcinoma	Positive	Positive	Negative	test	2	0
603719	39	3	Invasive ductal carcinoma	Negative	Negative	Negative	train	7	1
605249	59	3	Other type	Negative	Negative	Negative	train	3	1
606401	59	3	Invasive ductal carcinoma	Positive	Positive	Negative	train	6	1
606832	57	3	Invasive lobular carcinoma	Positive	Negative	Negative	train	6	1
607025	75	3	Invasive ductal carcinoma	Positive	Positive	Negative	train	9	1
607675	79	2	Invasive ductal carcinoma	Positive	Positive	Negative	val	4	1
608046	45	2.5	Invasive ductal carcinoma	Positive	Positive	Positive	val	8	1
608789	46	4	Invasive ductal carcinoma	Positive	Positive	Negative	train	5	1
